# Supplementary material for: Fecal Microbiota Alterations and Small Intestinal Bacterial Overgrowth in Functional Abdominal Bloating/Distention
Source: PubMed Central journal article supplement — J Neurogastroenterol Motil. 2020 Sep 30;26(4):539–49. doi: 10.5056/jnm20080 (PMC7547202; doi:10.5056/jnm20080), 2020-09-30
Supplement: JNM-26-539_Supple.pdf [file JNM-26-539_Supple.pdf]

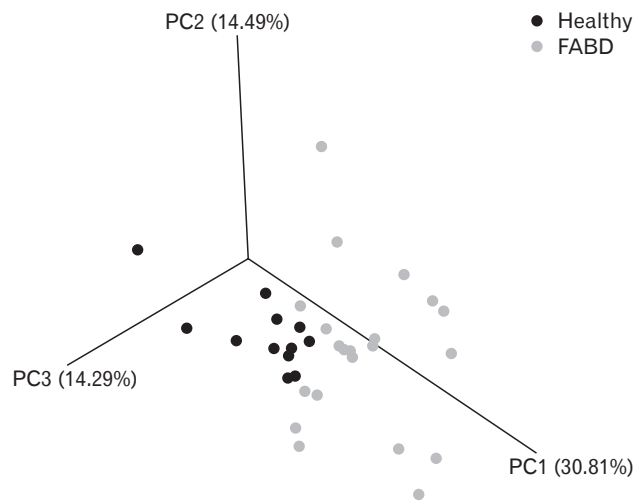

**Supplementary Figure 1.** Principle coordinate analysis with 3-dimensional plot between healthy controls and patients with functional abdominal bloating and distention (FABD). PC, principal component.

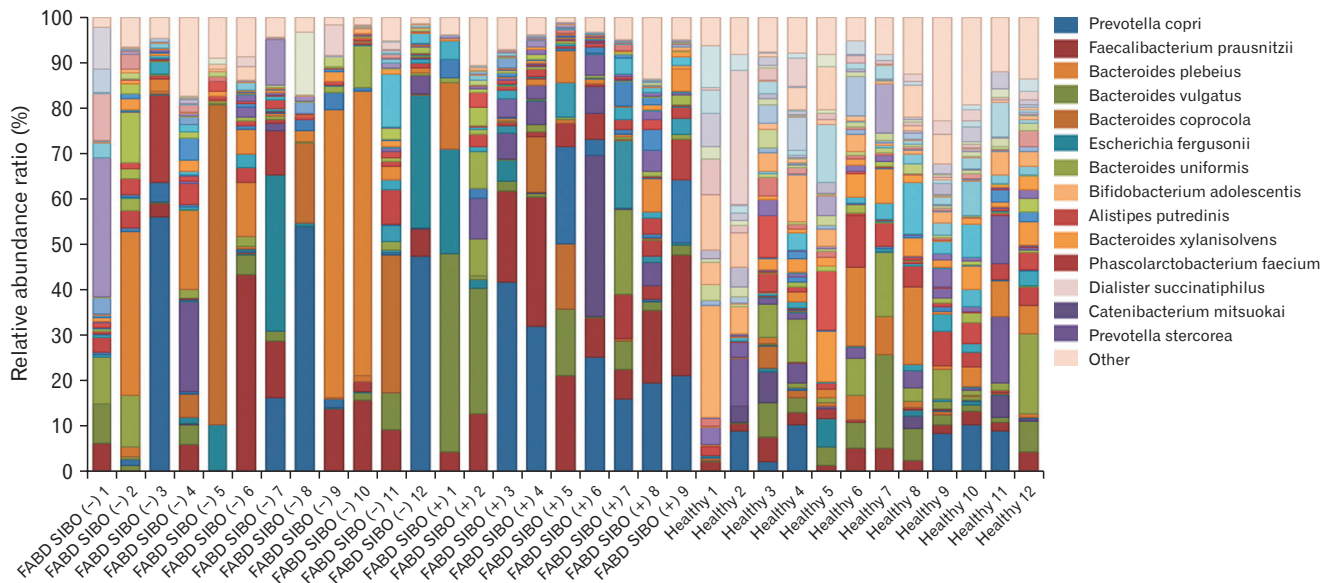

**Supplementary Figure 2.** Relative abundance of microbiota at the species level in all individual participants. Legends indicate the top 15 bacterial genera or species that were detected. FABD, functional abdominal bloating and distention; SIBO, small intestinal bacterial overgrowth.
